# Supplementary material
Source: publisher figshare collection journal article supplement (https://acs.figshare.com/ndownloader/files/13273736)
Supplement: Supplementary file 1 [file 13273736]

# Supporting Information

## Visible-Light-Active Photoelectrochemical Z-Scheme System Based on Top 5 Clarke-Number Elements

*Hironao Miyamoto,<sup>†</sup> Kosuke Matsuzaki,<sup>‡</sup> Akira Yamaguchi,<sup>†</sup> and Masahiro Miyauchi<sup>\*†</sup>*

<sup>†</sup> Department of Materials Science and Engineering, School of Materials and Chemical Technology, Tokyo Institute of Technology, 2-12-1 Ookayama, Meguro-ku, Tokyo 152-8552, Japan.

<sup>‡</sup> Materials Research Center for Element Strategy, Tokyo Institute of Technology, 4259 Nagatsuta, Midori-ku, Yokohama 226-8503, Japan

\* mmiyauchi@ceram.titech.ac.jp

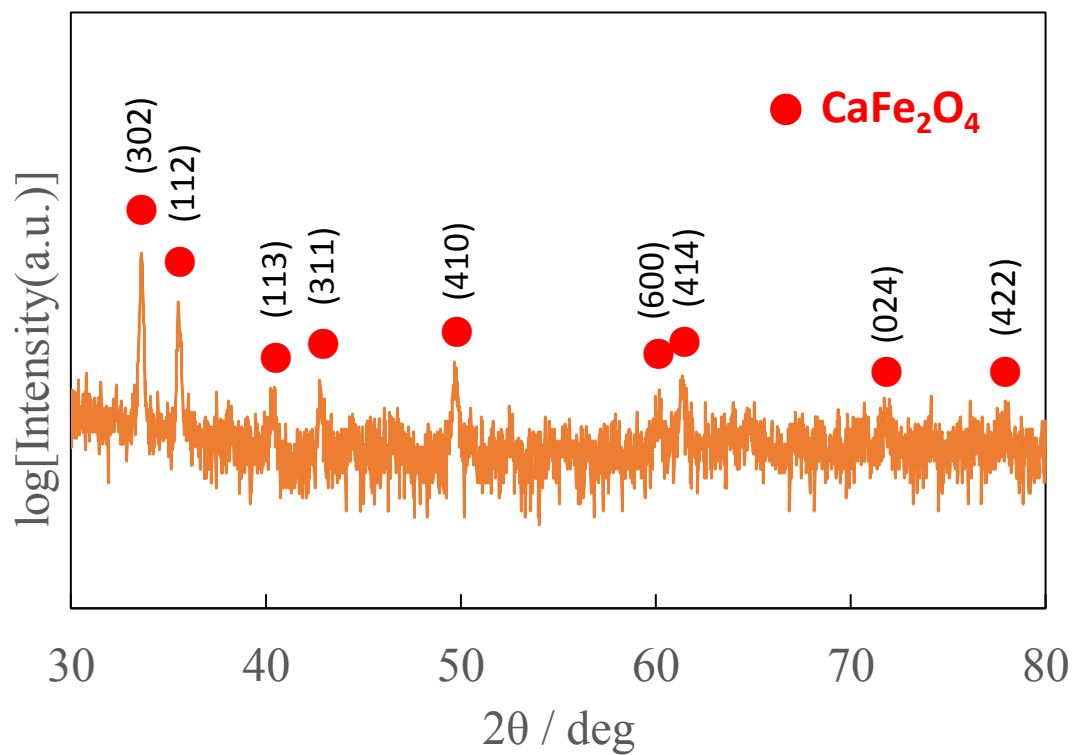

**Figure S1.** XRD pattern for the 800 nm-thick  $\text{CaFe}_2\text{O}_4$  film.

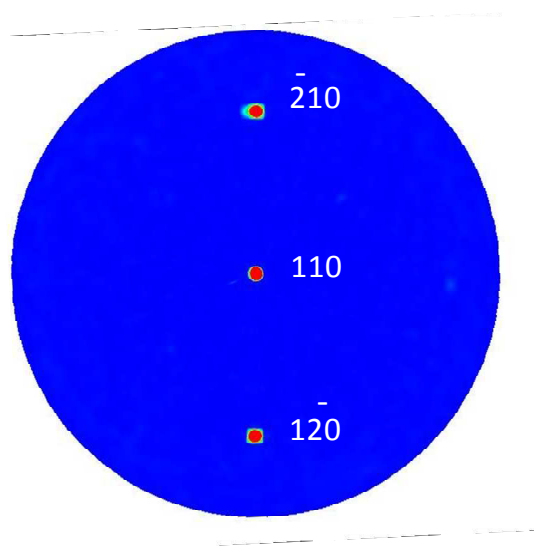

**Figure S2.** Pole figure of (11-20)  $\alpha\text{-Fe}_2\text{O}_3$  thin film grown on (101) Ta:SnO<sub>2</sub> film. The  $2\theta$  angle was fixed at 35.7 degree.

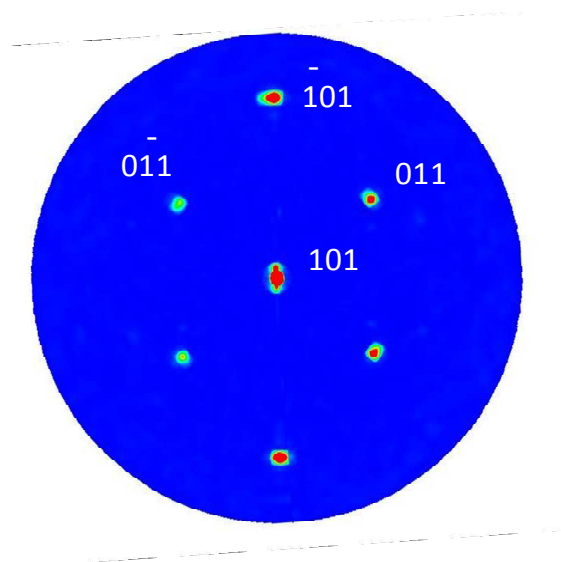

**Figure S3.** Pole figure of (101) Ta:SnO<sub>2</sub> thin film on the a-plane sapphire ((110)  $\alpha$ -Al<sub>2</sub>O<sub>3</sub>) substrate. The  $2\theta$  angle was fixed at 33.8 degree.

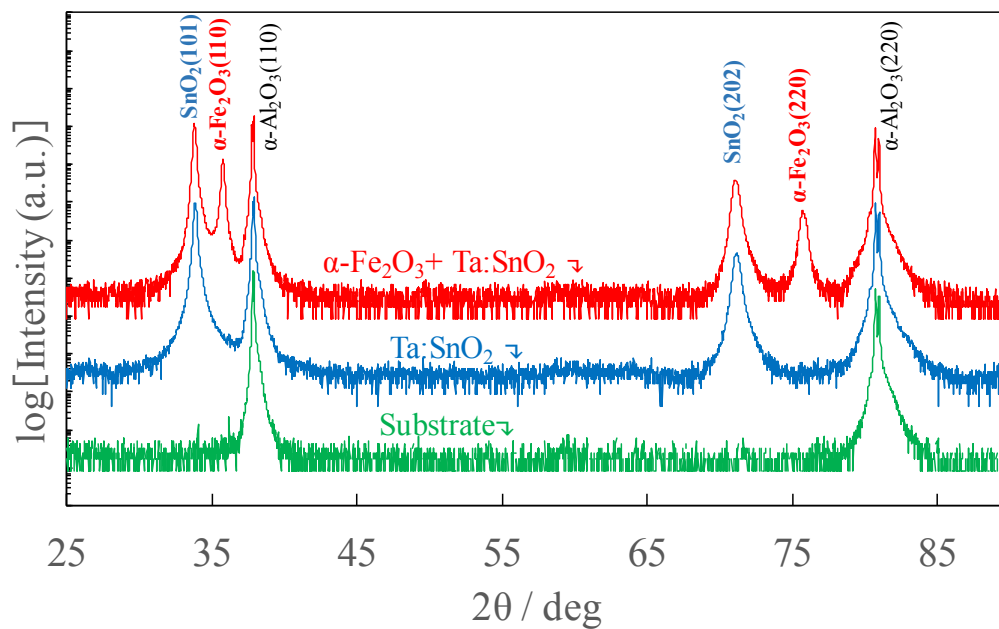

**Figure S4.** XRD patterns of sapphire substrate ((110)  $\alpha$ -Al<sub>2</sub>O<sub>3</sub>), Ta:SnO<sub>2</sub> thin film, and  $\alpha$ -Fe<sub>2</sub>O<sub>3</sub>/Ta:SnO<sub>2</sub> thin film, respectively.

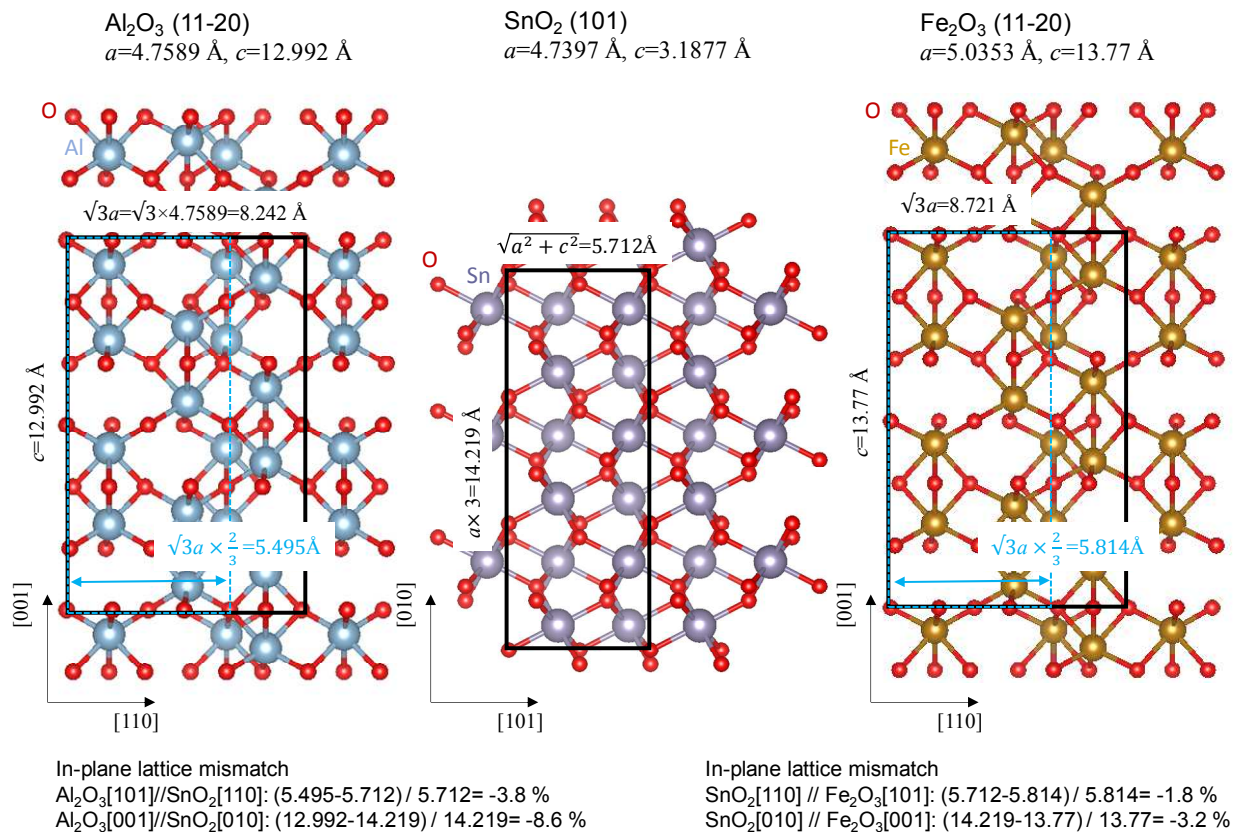

**Figure S5.** Calculation of lattice mismatch between each crystal.

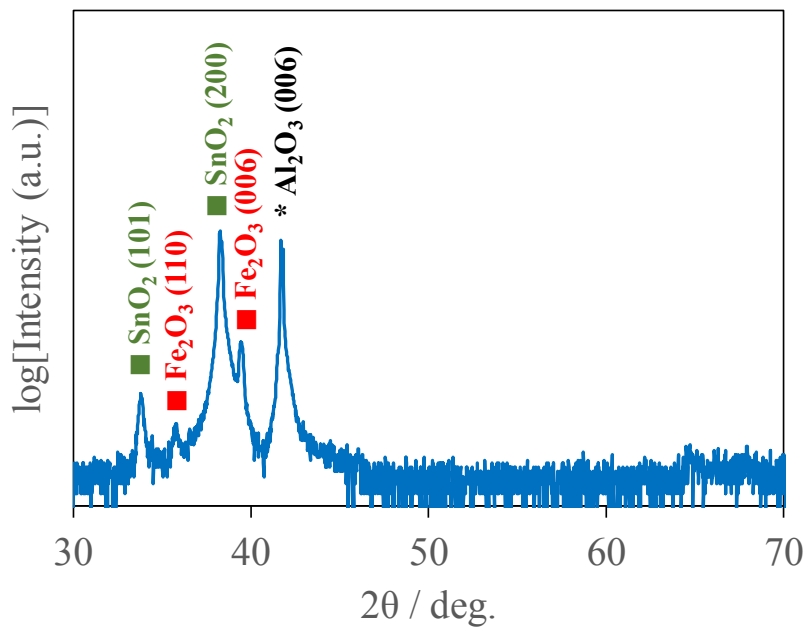

**Figure S6.** XRD patterns of the (001) oriented  $\text{Fe}_2\text{O}_3$  film.

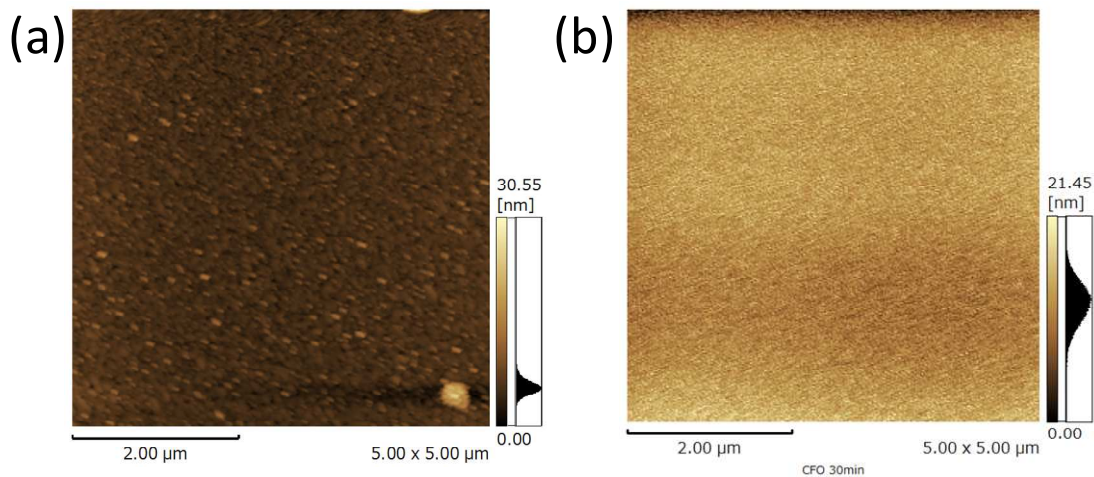

**Figure S7.** AFM images on the surfaces of  $\alpha\text{-Fe}_2\text{O}_3$  (a) and  $\text{CaFe}_2\text{O}_4$  (b) films. Roughness factors  $R_a$  (arithmetic average of the absolute values of the height profile) for the surfaces of  $\alpha\text{-Fe}_2\text{O}_3$  and  $\text{CaFe}_2\text{O}_4$  films were 1.71 nm and 1.23 nm, respectively.

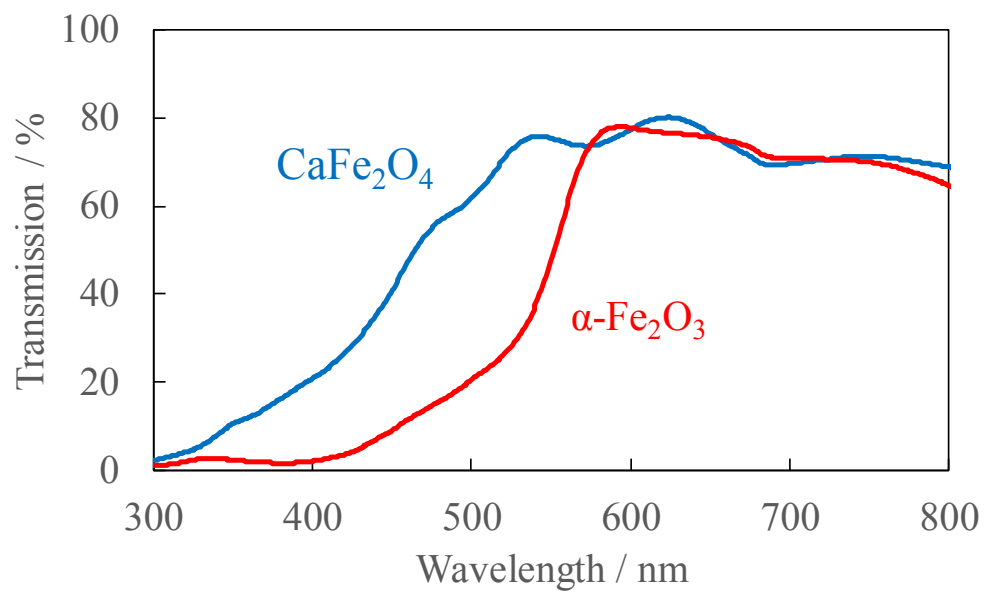

**Figure S8.** Optical transmission spectra of 100 nm-thick  $\alpha$ -Fe<sub>2</sub>O<sub>3</sub> and CaFe<sub>2</sub>O<sub>4</sub> thin films.

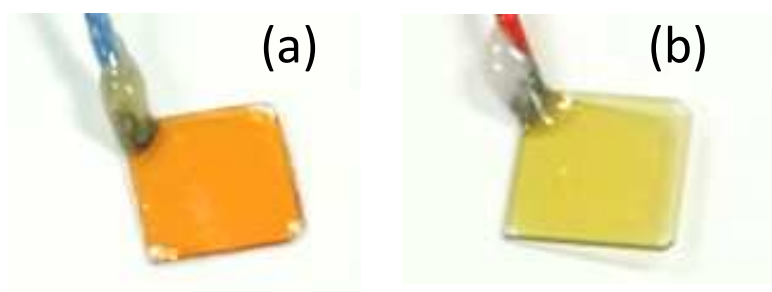

**Figure S9.** Photographs of  $\alpha$ -Fe<sub>2</sub>O<sub>3</sub> film (a) and CaFe<sub>2</sub>O<sub>4</sub> film (b). The size of these electrodes was 1 cm<sup>2</sup>.

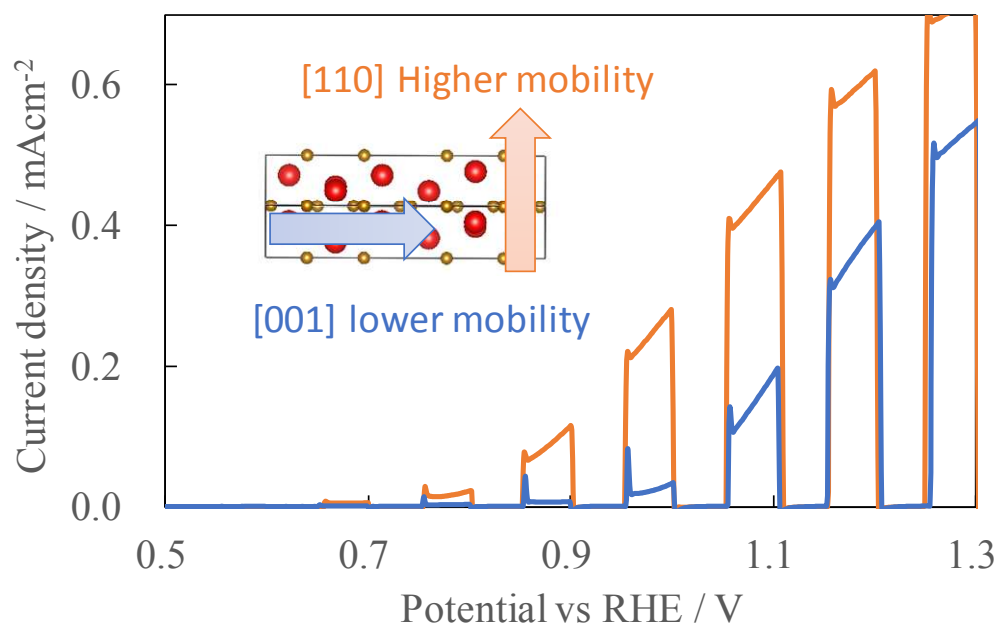

**Figure S10.** Photocurrent property of (110) and (001) oriented  $\alpha\text{-Fe}_2\text{O}_3$  thin films.

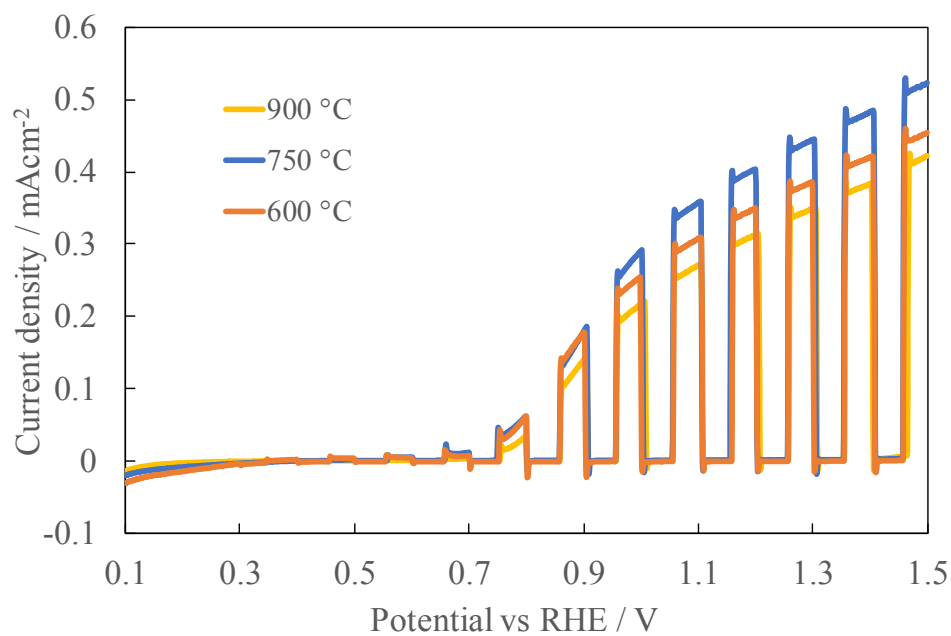

**Figure S11.** Photocurrent properties of  $\alpha\text{-Fe}_2\text{O}_3$  thin films synthesized through various annealing temperature conditions.

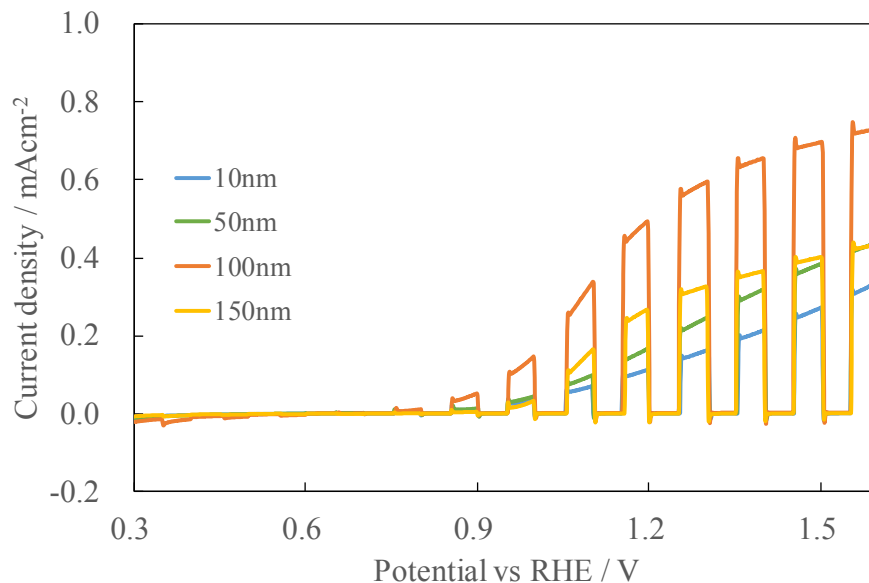

**Figure S12.** Photocurrent properties of  $\alpha$ -Fe<sub>2</sub>O<sub>3</sub> thin films with various  $\alpha$ -Fe<sub>2</sub>O<sub>3</sub> thickness.

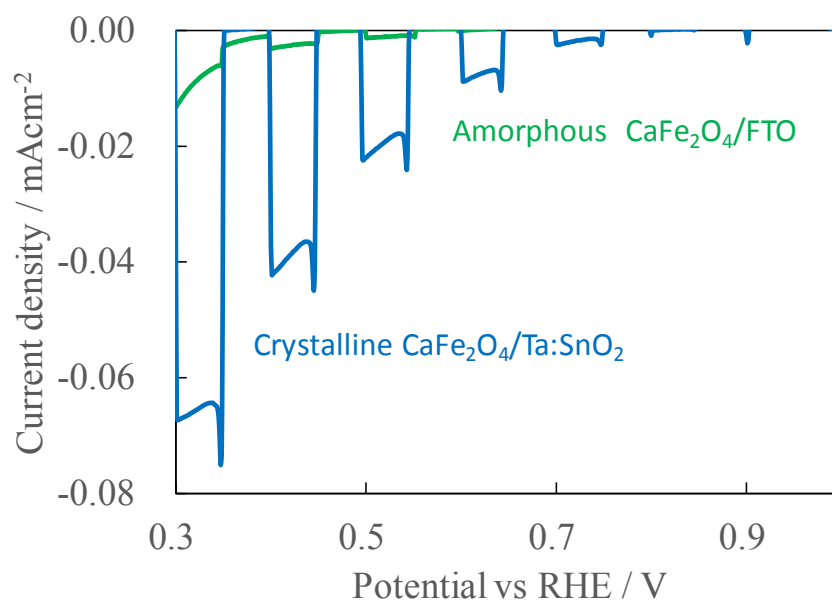

**Figure S13.** Photocurrent properties of crystalline CaFe<sub>2</sub>O<sub>4</sub>/Ta:SnO<sub>2</sub> and amorphous CaFe<sub>2</sub>O<sub>4</sub>/FTO films. Amorphous CaFe<sub>2</sub>O<sub>4</sub> film was coated on a commercial fluorine-doped SnO<sub>2</sub> (FTO) glass substrate as a control group.



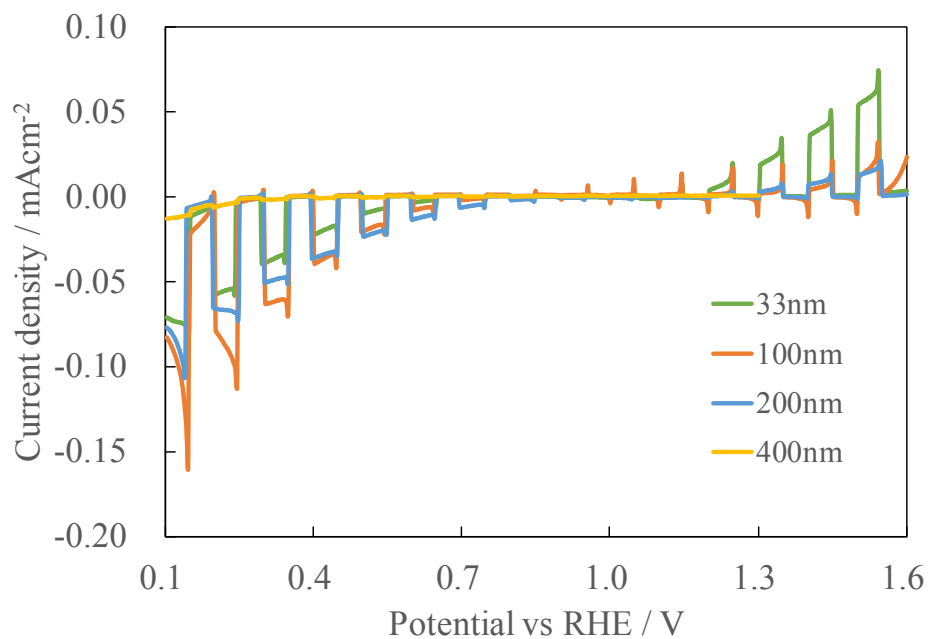

**Figure S14.** Photocurrent properties of  $\text{CaFe}_2\text{O}_4$  thin films with various thicknesses.

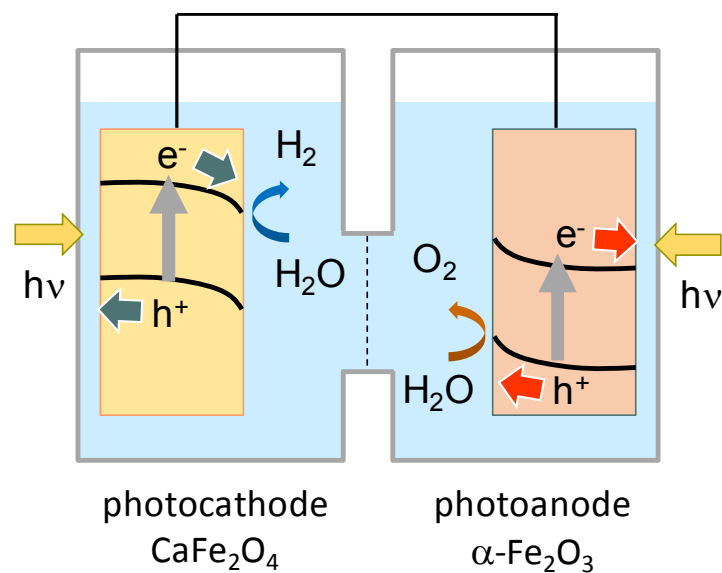

**Figure S15.** Experimental setup for the evaluation of the Z-scheme system.
